# Supplementary material
Source: publisher figshare collection journal article supplement (https://gsajournals.figshare.com/ndownloader/files/16251956)
Supplement: Supplementary file 1 [file 16251956]

Table S1: Overview of *C. orthopsilosis* isolates.

| Sample | Other Name | Clade | Source*a* |
| --- | --- | --- | --- |
| 423 | CP85 | 1 | (Tav) |
| 434 | CP289 | 1 | (Tav) |
| 1799 | CAS09-1799 | 1 | CDC |
| 425 | CP125 | 2 | (Tav) |
| 426 | CP185 | 2 | (Tav) |
| 427 | CP269 | 2 | (Tav) |
| 435 | CP296 | 2 | (Tav) |
| 436 | CP331 | 2 | (Tav) |
| 504 | CAS08-0504 | 2 | CDC |
| 831 | CAS09-0831 | 2 | CDC |
| B-8323 | B-8323 | 2 | CDC |
| 151 | CAS08-0151 | 3 | CDC |
| 151 eZCF29 | 151 eZCF29 | 3 | This study |
| 185 | CAS08-0185 | 3 | CDC |
| 421 | CP25 | 3 | (Tav) |
| 422 | CP47 | 3 | (Tav) |
| 433 | CP288 | 3 | (Tav) |
| 437 | CP344 | 3 | (Tav) |
| 599 | CAS08-0599 | 3 | CDC |
| 1540 | CAS09-1540 | 3 | CDC |
| 1825 | CAS10-1825 | 3 | CDC |
| 1825 eZCF29 | 1825 eZCF29 | 3 | This study |
| B-8274 | B-8274 | 3 | CDC |
| 424 | CP124 | 4.1 | (Tav) |
| 748 | CAS09-0748 | 4.1 | CDC |
| 282 | CAS08-0282 | 4.2 | CDC |
| 320 | CAS08-0320 | 4.2 | CDC |
| 498 | CAS08-0498 | 4.3 | CDC |
| 428 | CP287 | - | (Tav) |
| 90-125 | 90-125 | - | (Tav) |
|  |  |  |  |

*a*Tav = Tavanti A. et al. J Clin Microbiol. 2007 45:1455-62, CDC = Centers for Disease Control and Prevention
